# Supplementary material for: Synthesis of hybrids thiazole–quinoline, thiazole–indole and their analogs: in vitro anti-proliferative effects on cancer cell lines, DNA binding properties and molecular modeling
Source: Royal Society of Chemistry journal article supplement (doi:10.1039/d1nj02105b), 2021-01-01

## *New Journal of Chemistry* Supplementary Information

### **Synthesis of Hybrids Thiazole-quinoline, Thiazole-indole and Analogs: *in vitro* Anti-proliferative Effects on Cancer Cell Lines, DNA Binding Properties and Molecular Modeling**

Paulo Fernando da S. Santos-Junior<sup>a,†</sup>, Igor José dos S. Nascimento<sup>a,†</sup>, Edjan Carlos D. da Silva<sup>a</sup>, Kadja Luana C. Monteiro<sup>a</sup>, Johnnatan D. de Freitas<sup>b</sup>, Samaysa de Lima Lins<sup>c</sup>, Thamilla Maria S. Maciel<sup>d</sup>, Bruno C. Cavalcanti<sup>e</sup>, José de Brito V. Neto<sup>e</sup>, Fabiane C. de Abreu<sup>c</sup>, Isis M. Figueiredo<sup>d</sup>, Josué Carinhanha C. Santos<sup>d</sup>, Claudia do Ó Pessoa<sup>e</sup>, Edeildo F. da Silva-Júnior<sup>a</sup>, João X. de Araújo-Júnior<sup>a</sup>, Thiago M. de Aquino<sup>a,\*</sup>

<sup>a</sup>Laboratory of Medicinal Chemistry, Institute of Pharmaceutical Sciences, Federal University of Alagoas, Maceió-AL, Brazil; <sup>b</sup>Instrumental Analysis Laboratory, Federal Institute of Alagoas, Maceió-AL, Brazil; <sup>c</sup>Laboratory of Electrochemistry and Microsystems for Analysis, Institute of Chemistry and Biotechnology, Federal University of Alagoas, Maceió-AL, Brazil; <sup>d</sup>Laboratory of Instrumentation and Development in Analytical Chemistry, Institute of Chemistry and Biotechnology, Federal University of Alagoas, Maceió-AL, Brazil; <sup>e</sup>Drug Research and Development Cente-NPDM, Department of Physiology and Pharmacology, Faculty of Medicine, Federal University of Ceará, Fortaleza-CE, Brazil

\*Corresponding author. E-mail adress: [thiago.aquino@iqb.ufal.br](mailto:thiago.aquino@iqb.ufal.br) (T. M. Aquino)

### **Contents**

|                                          |     |
|------------------------------------------|-----|
| Spectroscopic data of compound <b>2</b>  | S2  |
| Spectroscopic data of compound <b>3</b>  | S3  |
| Spectroscopic data of compound <b>4a</b> | S4  |
| Spectroscopic data of compound <b>4b</b> | S6  |
| Spectroscopic data of compound <b>4c</b> | S8  |
| Spectroscopic data of compound <b>4d</b> | S10 |
| Spectroscopic data of compound <b>4e</b> | S12 |
| Spectroscopic data of compound <b>4f</b> | S14 |
| Spectroscopic data of compound <b>5a</b> | S16 |
| Spectroscopic data of compound <b>5b</b> | S17 |
| Spectroscopic data of compound <b>5c</b> | S19 |
| Spectroscopic data of compound <b>5d</b> | S20 |
| Spectroscopic data of compound <b>5e</b> | S21 |
| Spectroscopic data of compound <b>5f</b> | S23 |

## HPLC of 2-(7-Chloroquinolin-4-yl)hydrazinecarbothioamide (2)

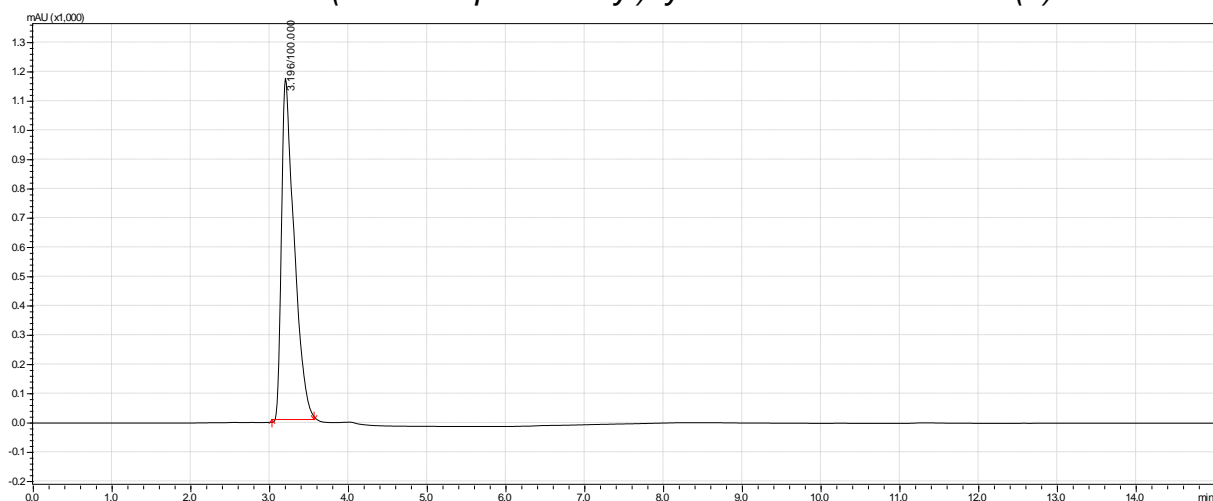

## HRMS of 2-(7-Chloroquinolin-4-yl)hydrazinecarbothioamide (2)

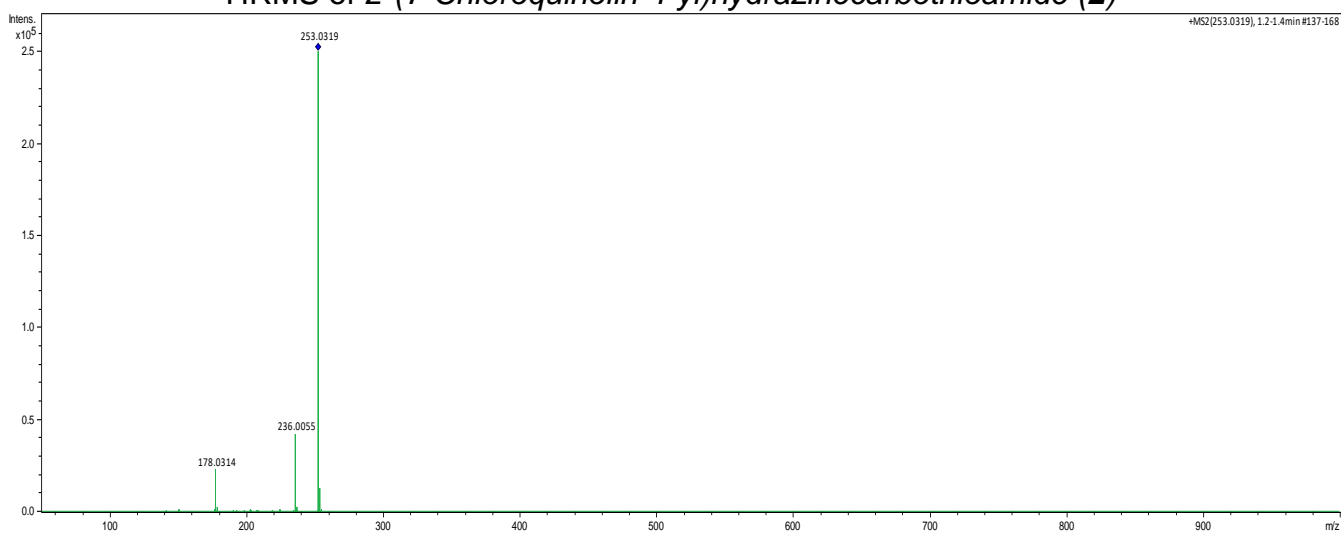

HPLC of (*E*)-2-((1*H*-indol-3-yl)methylene)hydrazinecarbothioamide (**3**)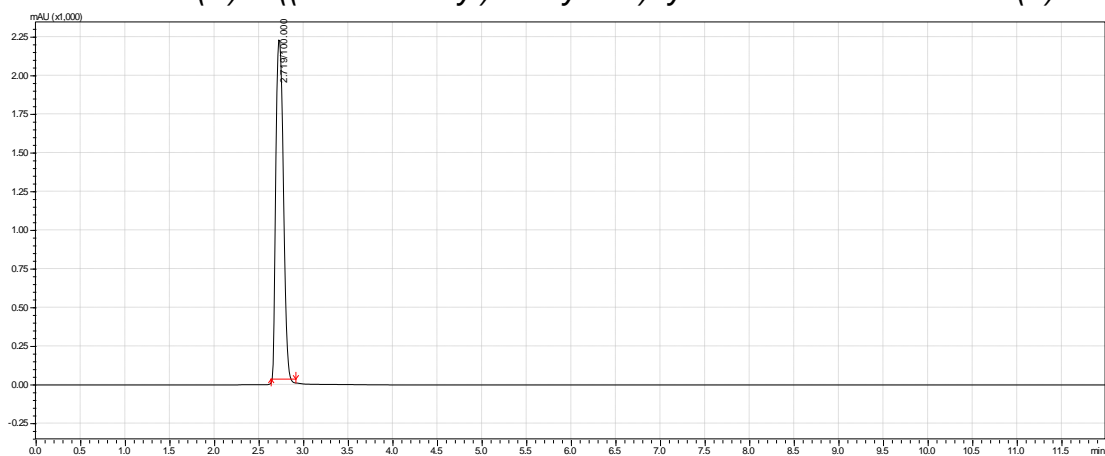HRMS of (*E*)-2-((1*H*-indol-3-yl)methylene)hydrazinecarbothioamide (**3**)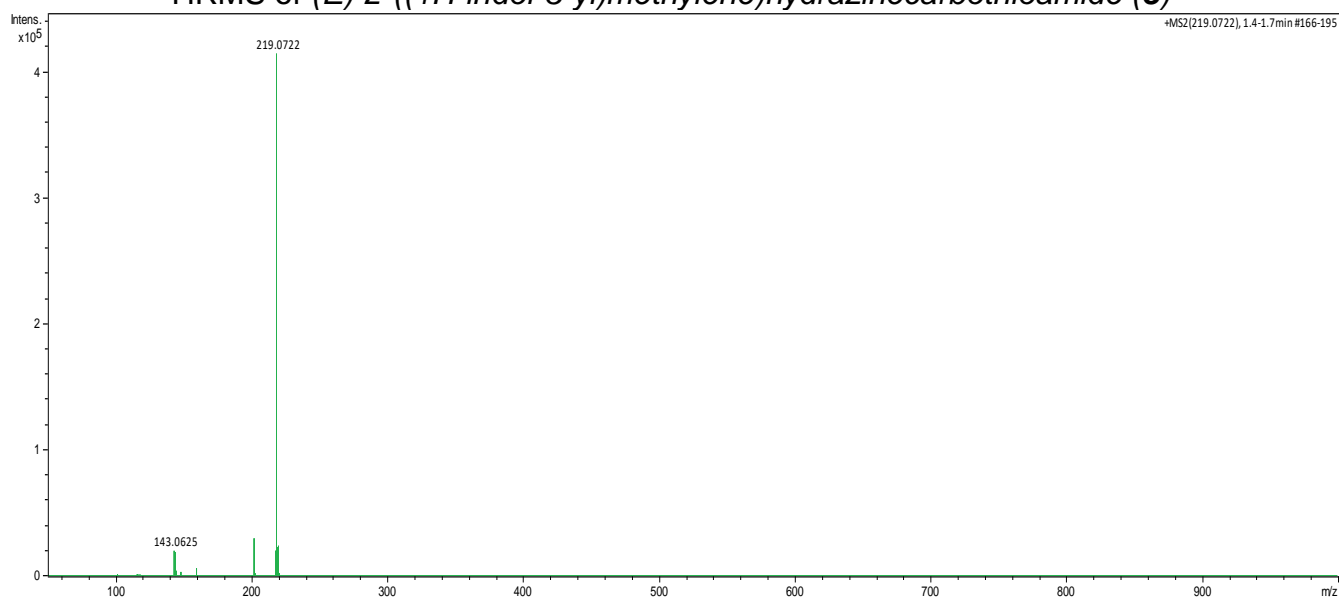

**<sup>1</sup>H NMR of 2-(2-(7-Chloroquinolin-4-yl)hydrazinyl)thiazol-4(5H)-one (4a)**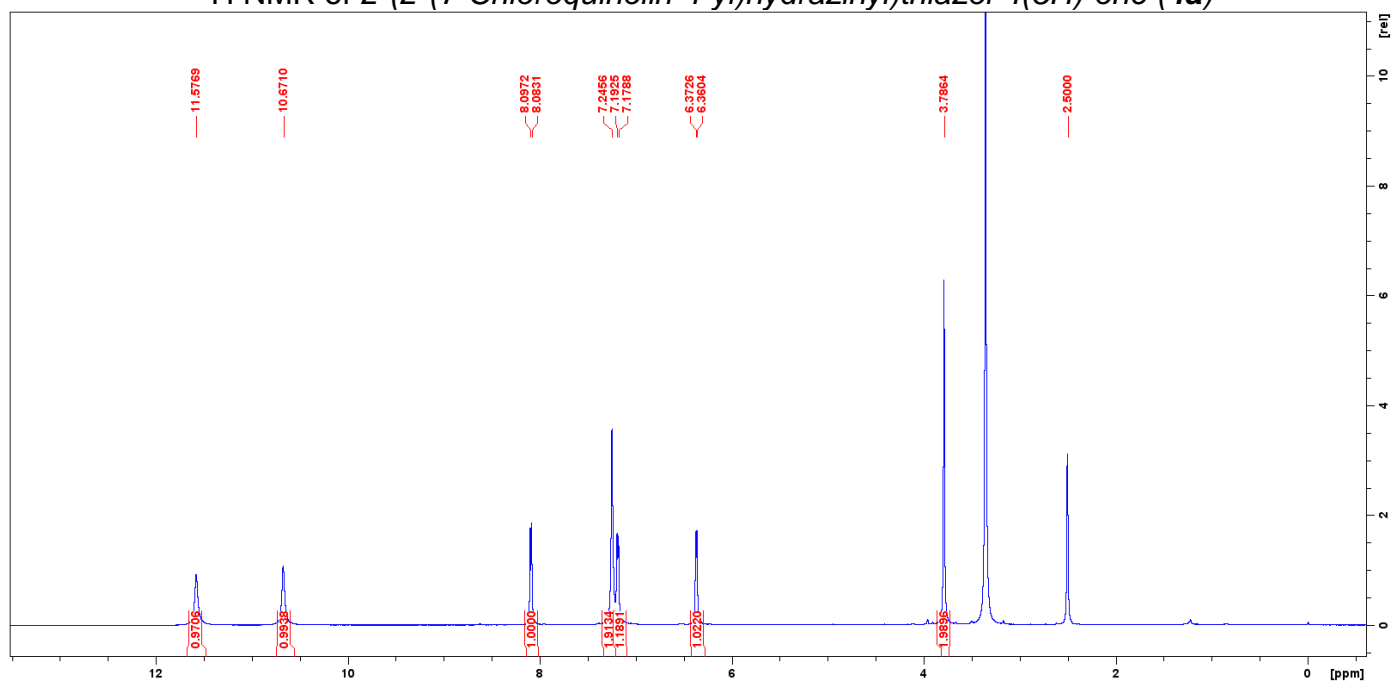**<sup>13</sup>C NMR of 2-(2-(7-Chloroquinolin-4-yl)hydrazinyl)thiazol-4(5H)-one (4a)**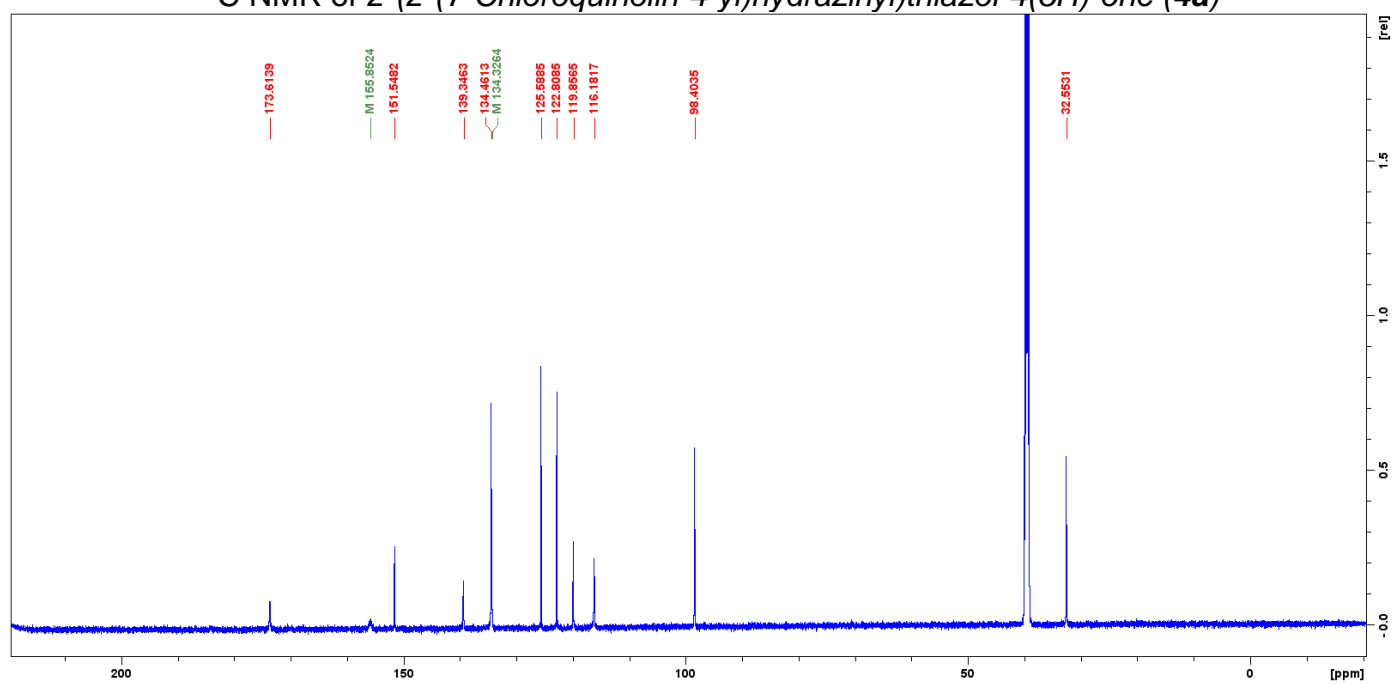

HPLC of 2-(2-(7-Chloroquinolin-4-yl)hydrazinyl)thiazol-4(5H)-one (**4a**)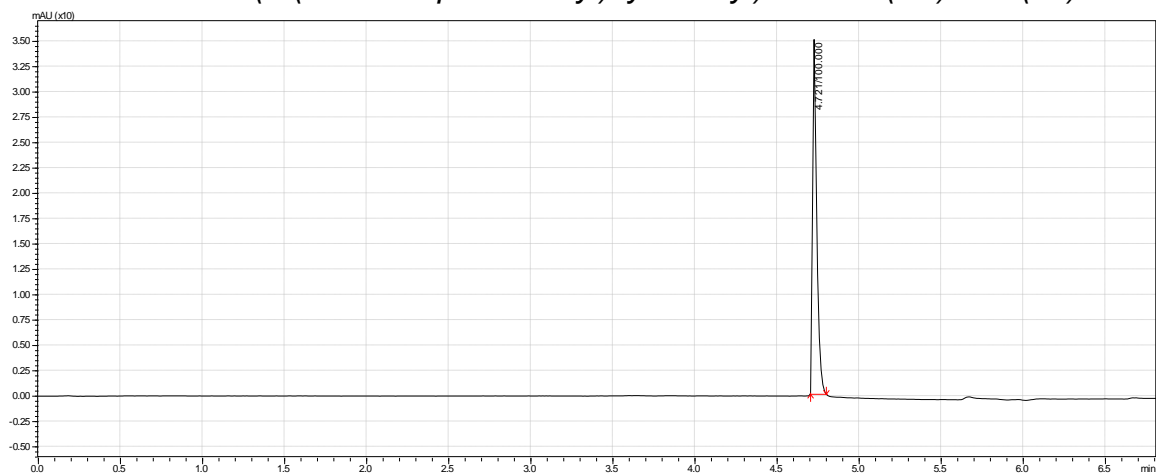HRMS of 2-(2-(7-Chloroquinolin-4-yl)hydrazinyl)thiazol-4(5H)-one (**4a**)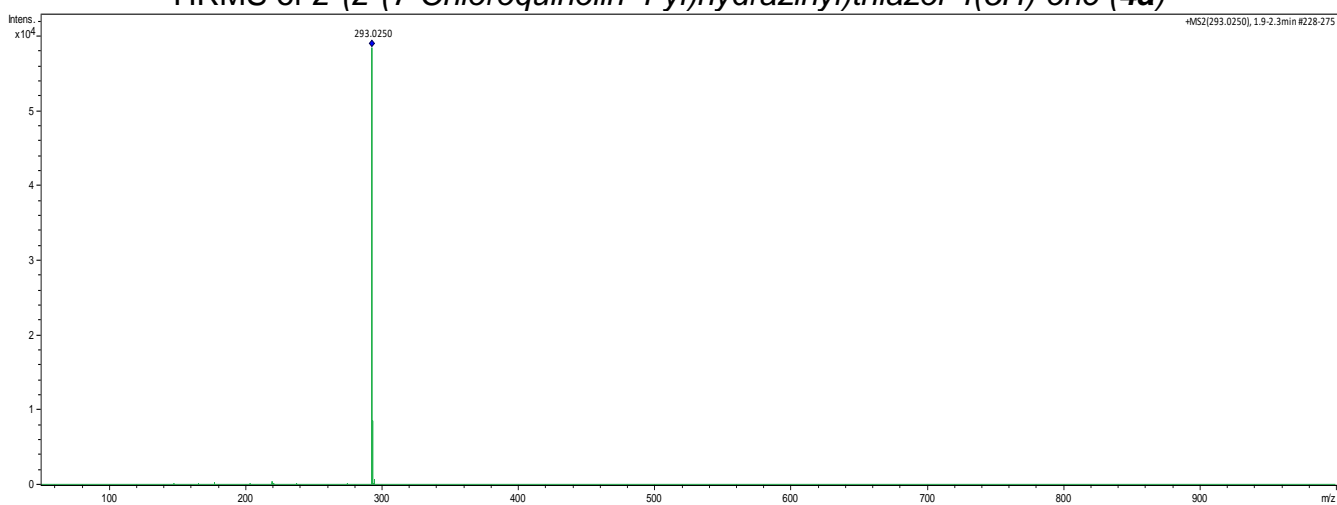

<sup>1</sup>H NMR of 2-(2-(2-(7-Chloroquinolin-4-yl)hydrazinyl)-4-oxo-4,5-dihydrothiazol-5-yl)acetic acid (**4b**)

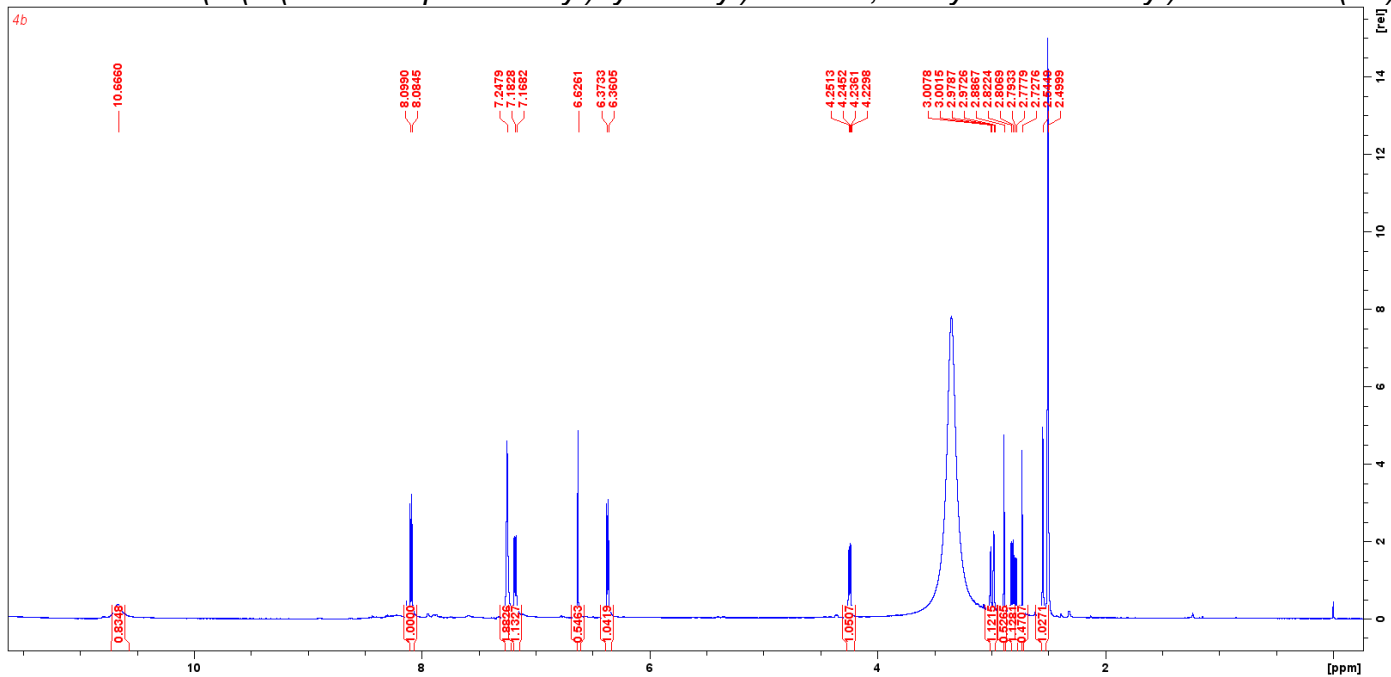

<sup>13</sup>C NMR of 2-(2-(2-(7-Chloroquinolin-4-yl)hydrazinyl)-4-oxo-4,5-dihydrothiazol-5-yl)acetic acid (**4b**)

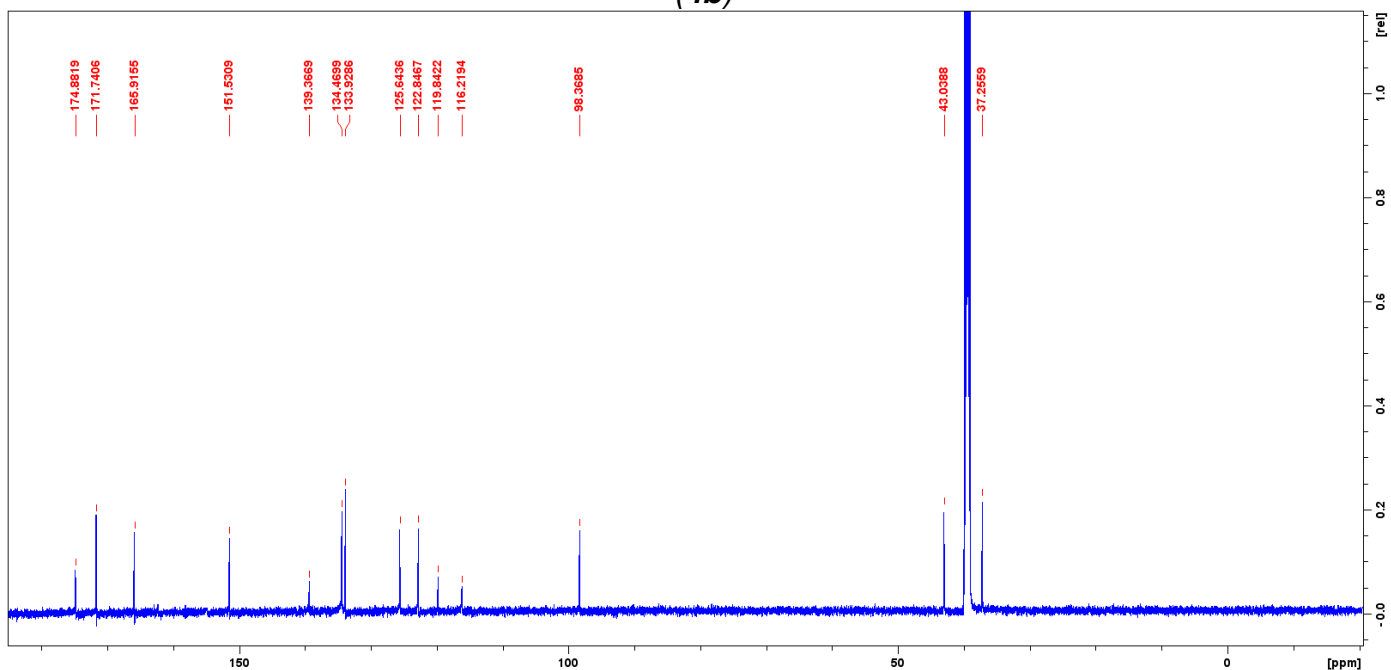

HPLC of 2-(2-(2-(7-Chloroquinolin-4-yl)hydrazinyl)-4-oxo-4,5-dihydrothiazol-5-yl)acetic acid (**4b**)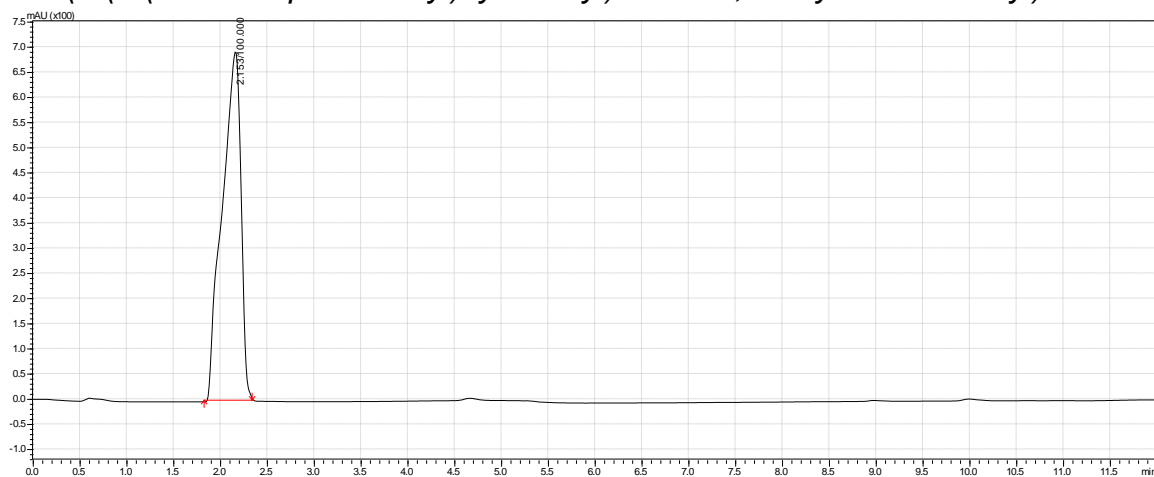HRMS of 2-(2-(2-(7-Chloroquinolin-4-yl)hydrazinyl)-4-oxo-4,5-dihydrothiazol-5-yl)acetic acid (**4b**)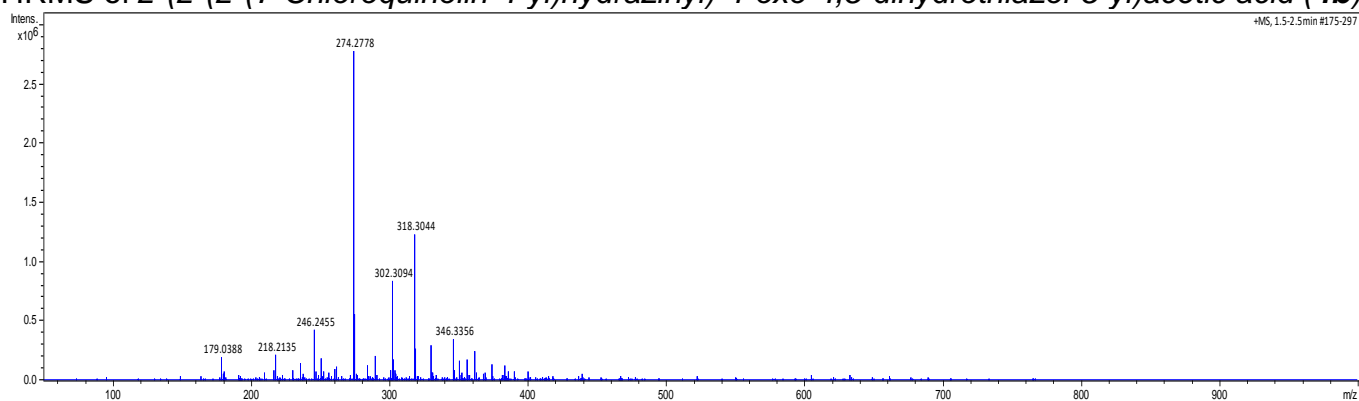

$^1\text{H}$  NMR of Ethyl 2-(2-(7-chloroquinolin-4-yl)hydrazinyl)-4-methylthiazole-5-carboxylate (**4c**)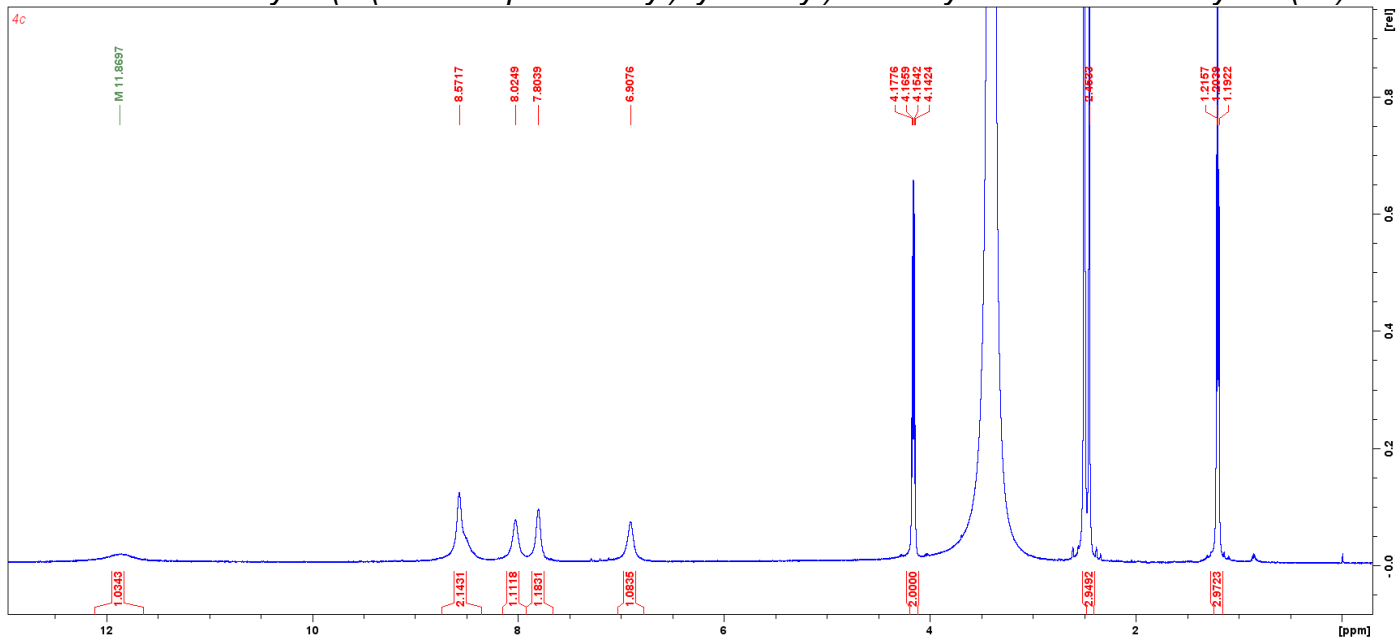 $^{13}\text{C}$  NMR of Ethyl 2-(2-(7-chloroquinolin-4-yl)hydrazinyl)-4-methylthiazole-5-carboxylate (**4c**)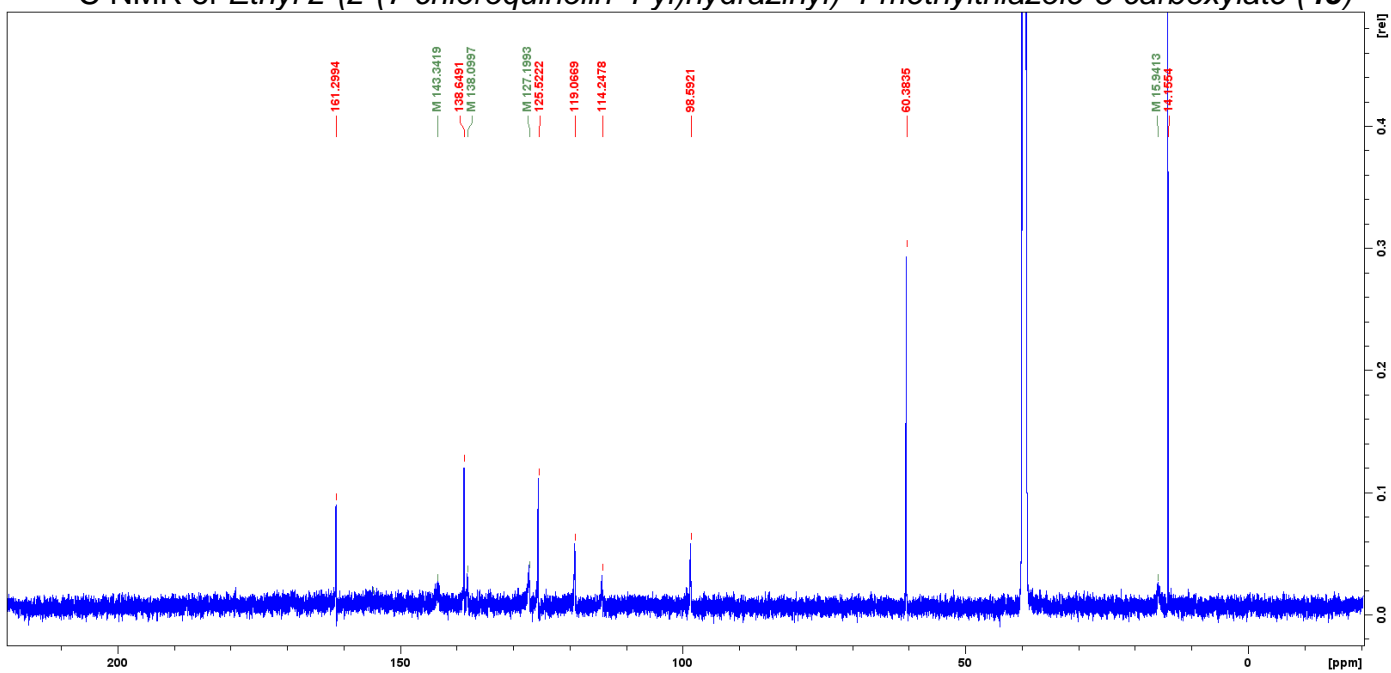



HPLC of *Ethyl 2-(2-(7-chloroquinolin-4-yl)hydrazinyl)-4-methylthiazole-5-carboxylate (4c)*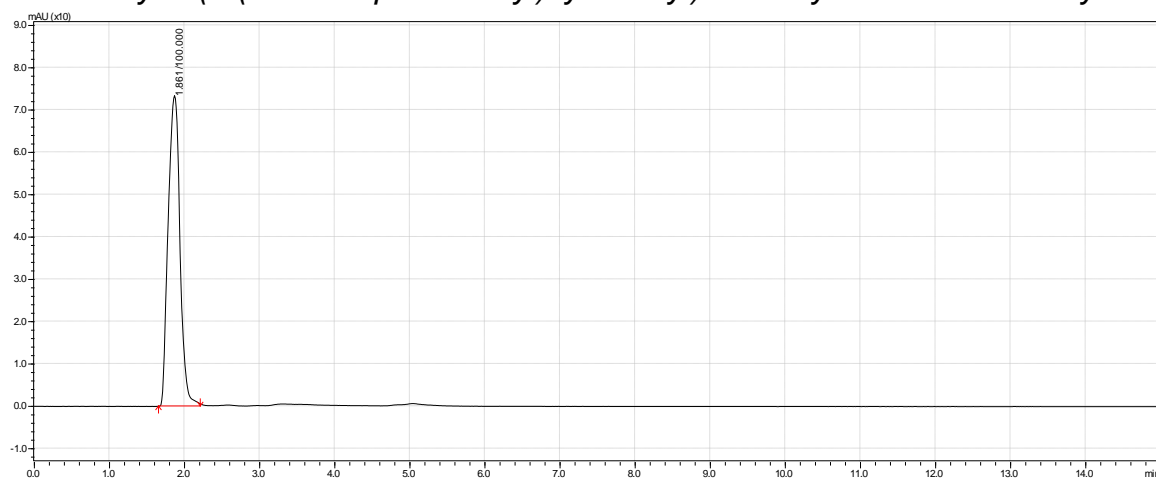HRMS of *Ethyl 2-(2-(7-chloroquinolin-4-yl)hydrazinyl)-4-methylthiazole-5-carboxylate (4c)*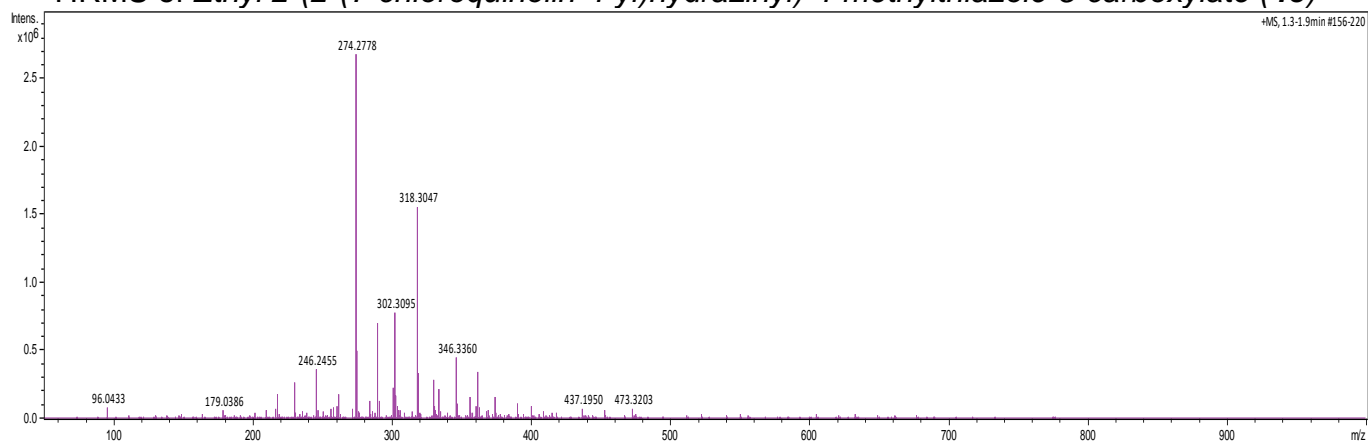

<sup>1</sup>H NMR of 2-(2-(7-Chloroquinolin-4-yl)hydrazinyl)-4-phenylthiazole (**4d**)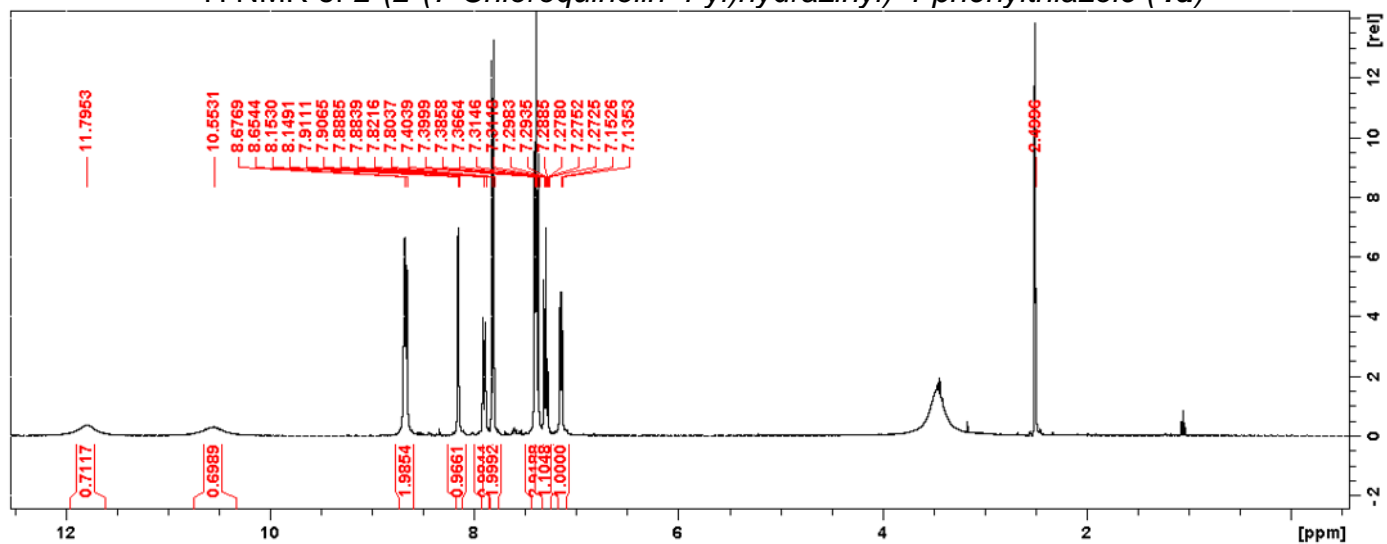<sup>13</sup>C NMR of 2-(2-(7-Chloroquinolin-4-yl)hydrazinyl)-4-phenylthiazole (**4d**)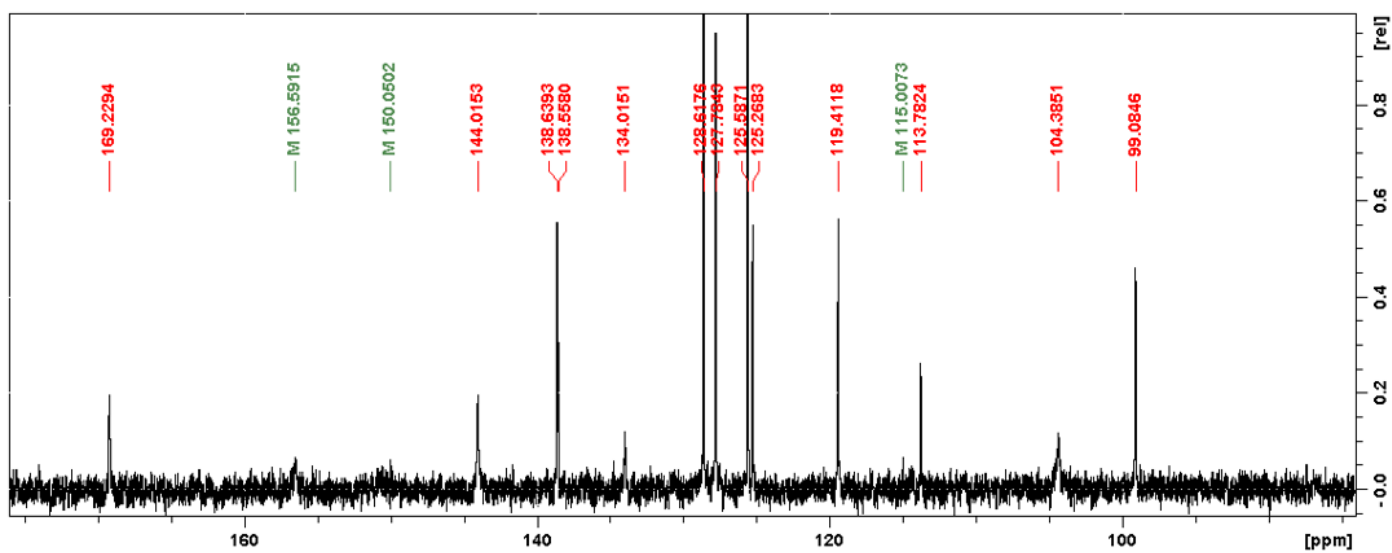

HPLC of 2-(2-(7-Chloroquinolin-4-yl)hydrazinyl)-4-phenylthiazole (**4d**)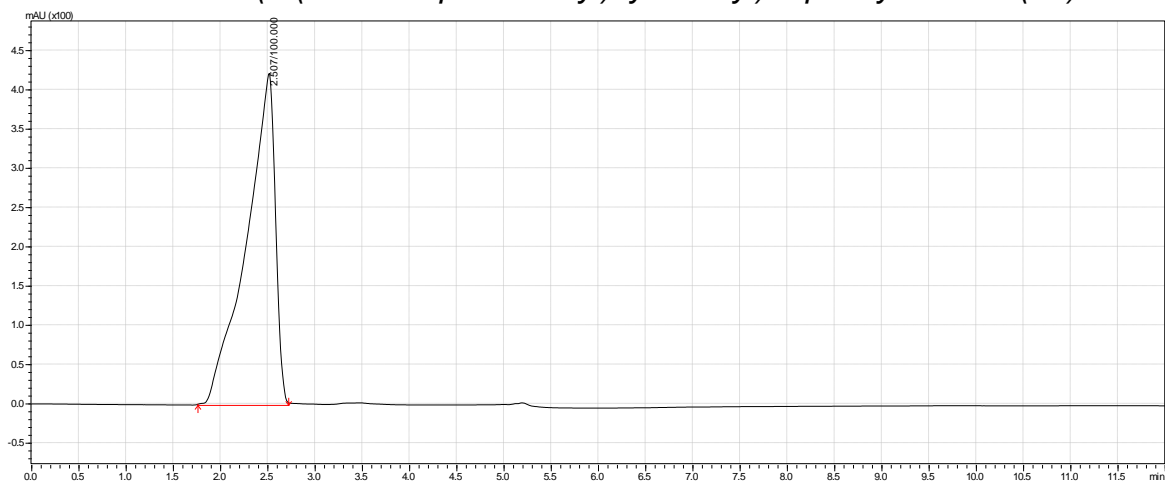HRMS of 2-(2-(7-Chloroquinolin-4-yl)hydrazinyl)-4-phenylthiazole (**4d**)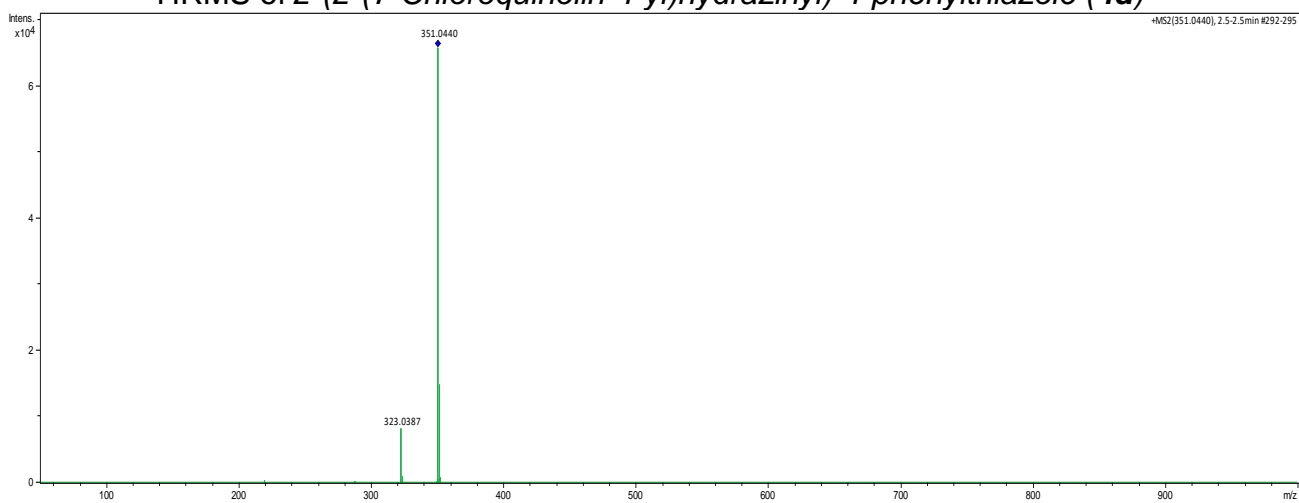

**<sup>1</sup>H NMR of 2-(2-(7-Chloroquinolin-4-yl)hydrazinyl)-4,5-dihydrothiazole (4e)**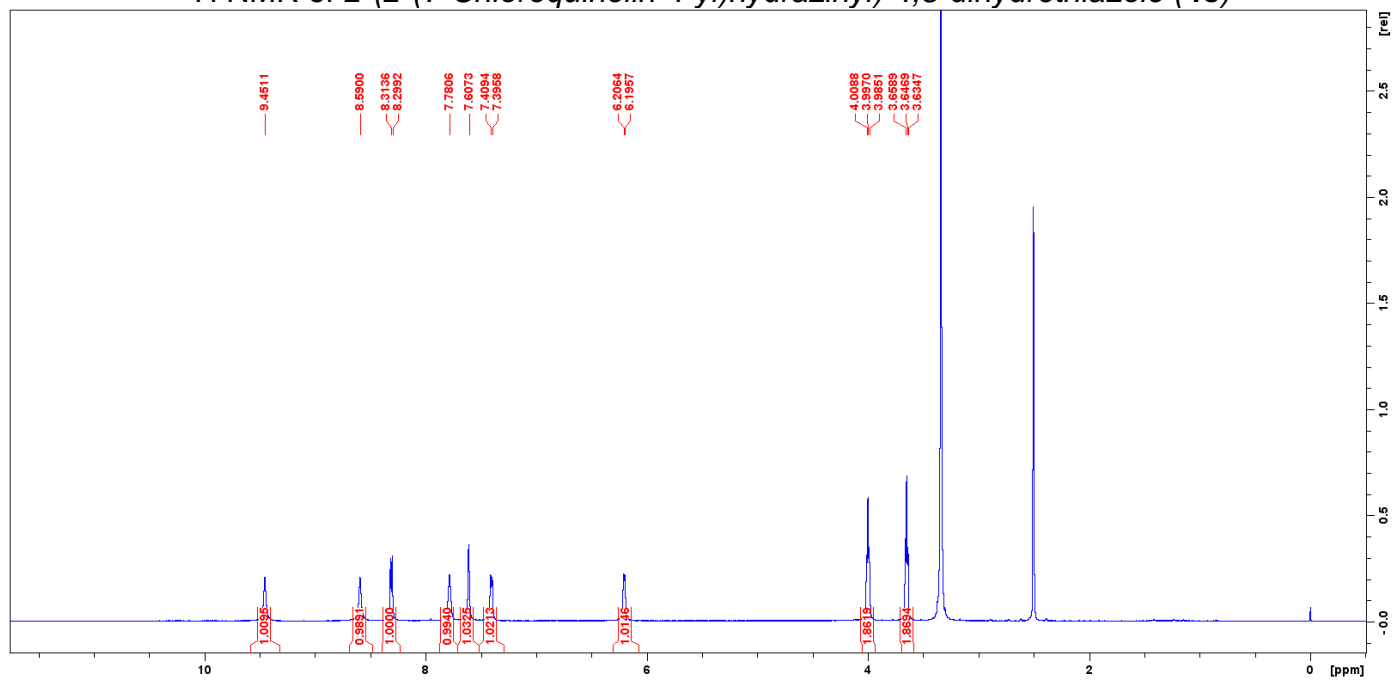**<sup>13</sup>C NMR of 2-(2-(7-Chloroquinolin-4-yl)hydrazinyl)-4,5-dihydrothiazole (4e)**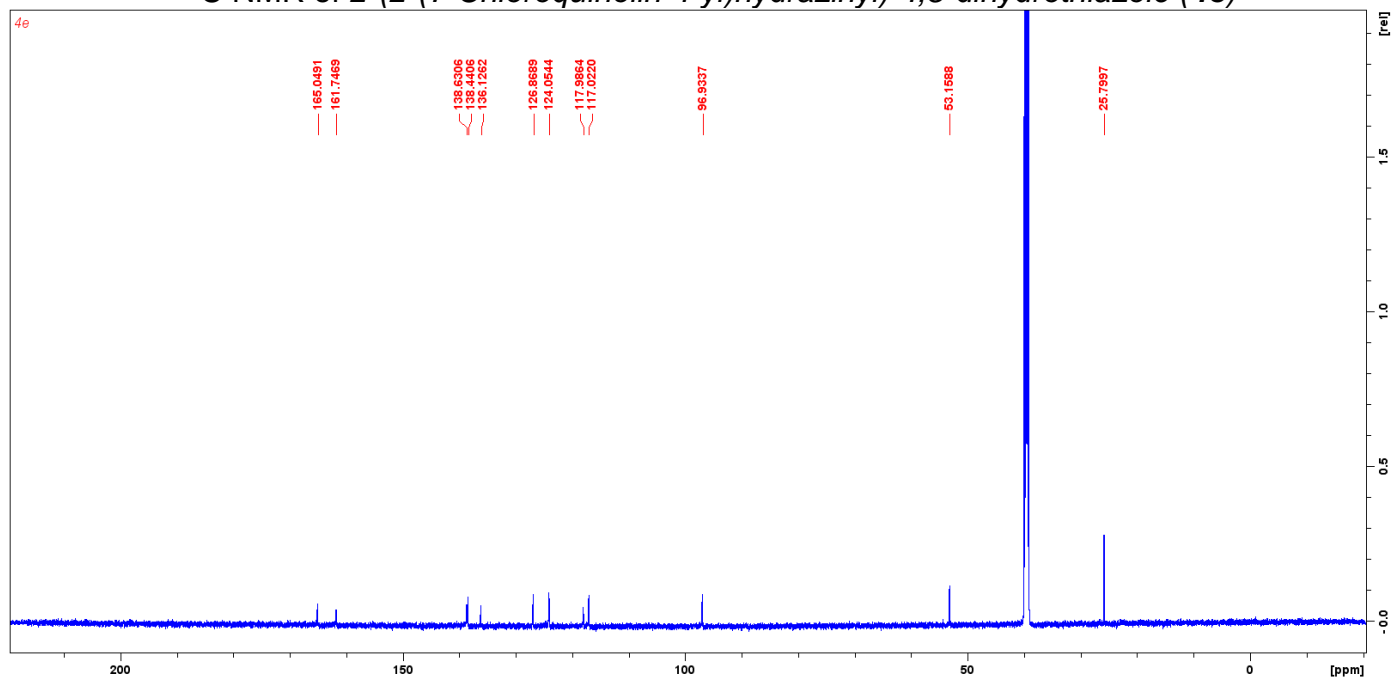

HPLC of 2-(2-(7-Chloroquinolin-4-yl)hydrazinyl)-4,5-dihydrothiazole (**4e**)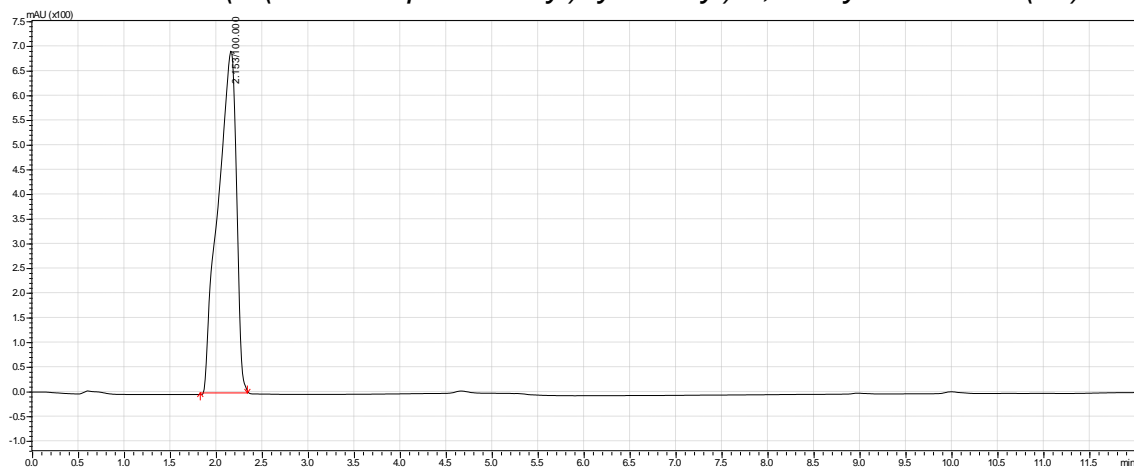HRMS of 2-(2-(7-Chloroquinolin-4-yl)hydrazinyl)-4,5-dihydrothiazole (**4e**)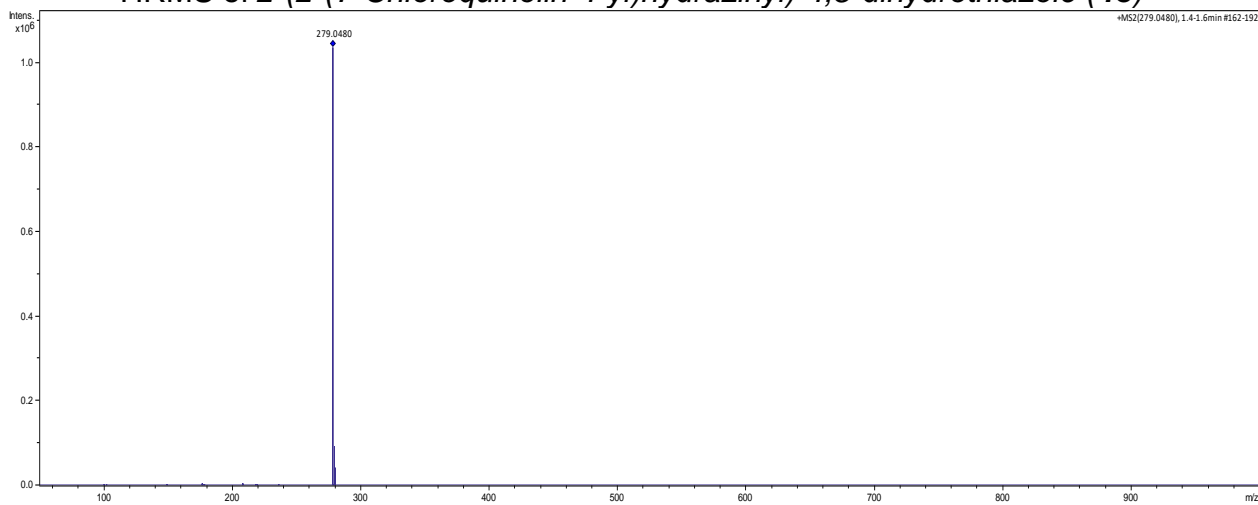

$^1\text{H}$  NMR of 2-(2-(7-Chloroquinolin-4-yl)hydrazinyl)-5,6-dihydro-4H-1,3-thiazine (**4f**)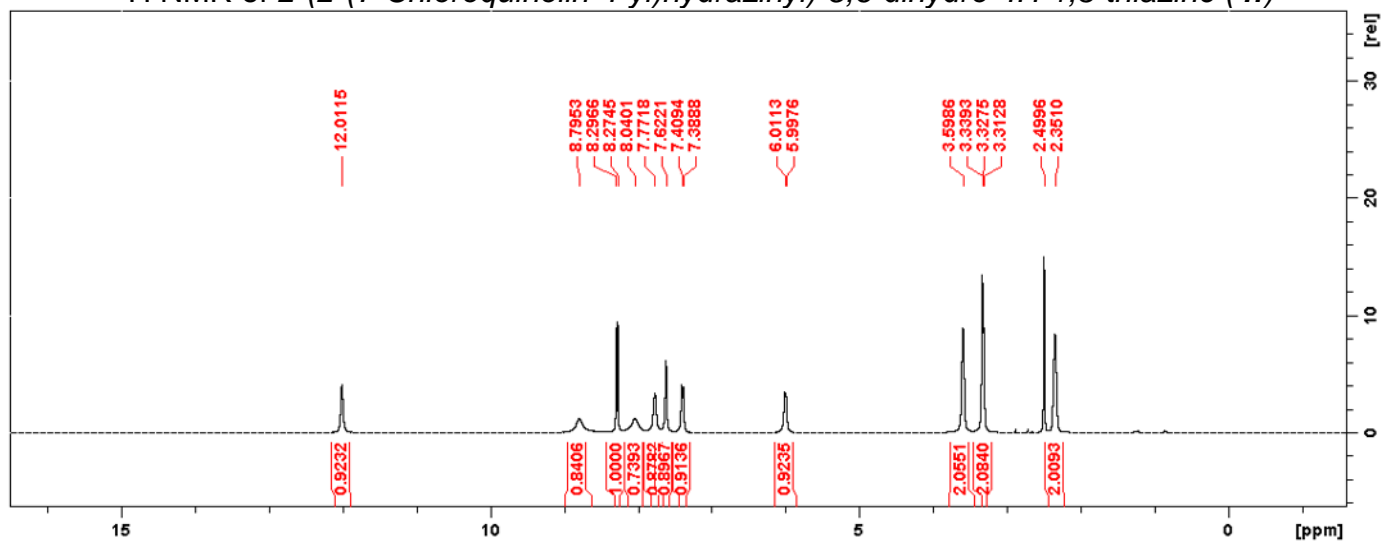 $^{13}\text{C}$  NMR of 2-(2-(7-Chloroquinolin-4-yl)hydrazinyl)-5,6-dihydro-4H-1,3-thiazine (**4f**)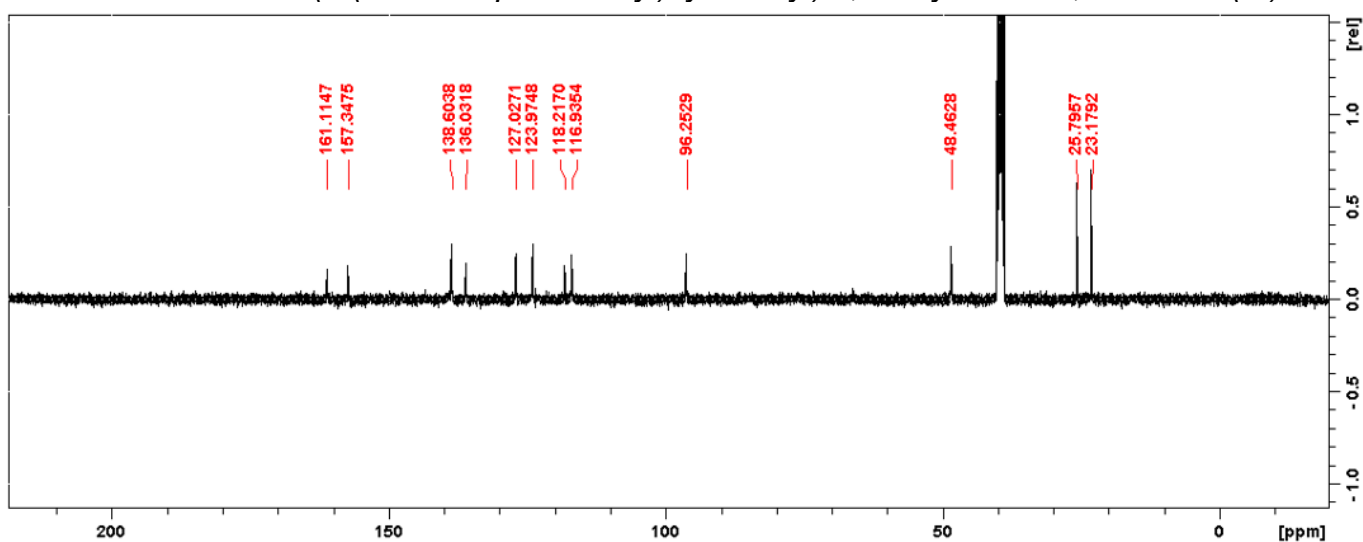HPLC of 2-(2-(7-Chloroquinolin-4-yl)hydrazinyl)-5,6-dihydro-4H-1,3-thiazine (**4f**)

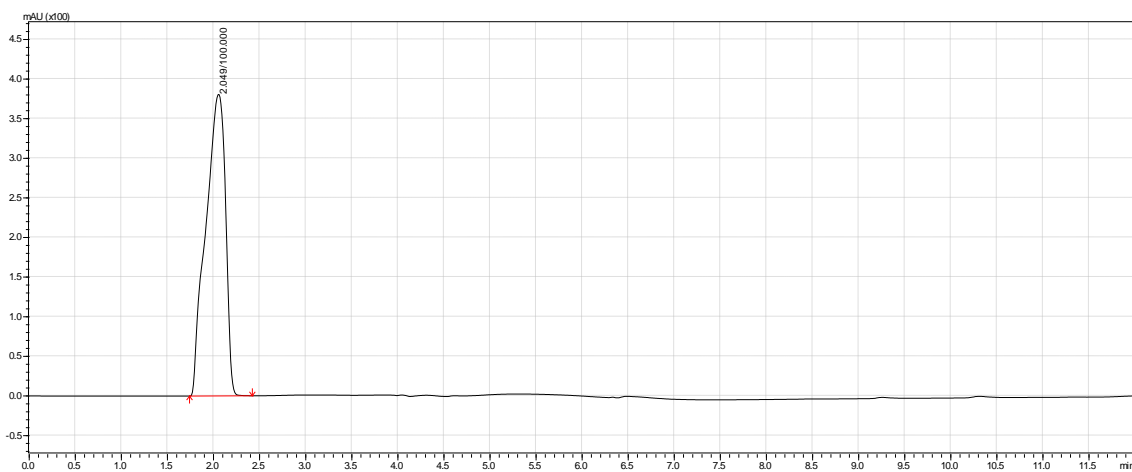

HRMS of 2-(2-(7-Chloroquinolin-4-yl)hydrazinyl)-5,6-dihydro-4H-1,3-thiazine (**4f**)

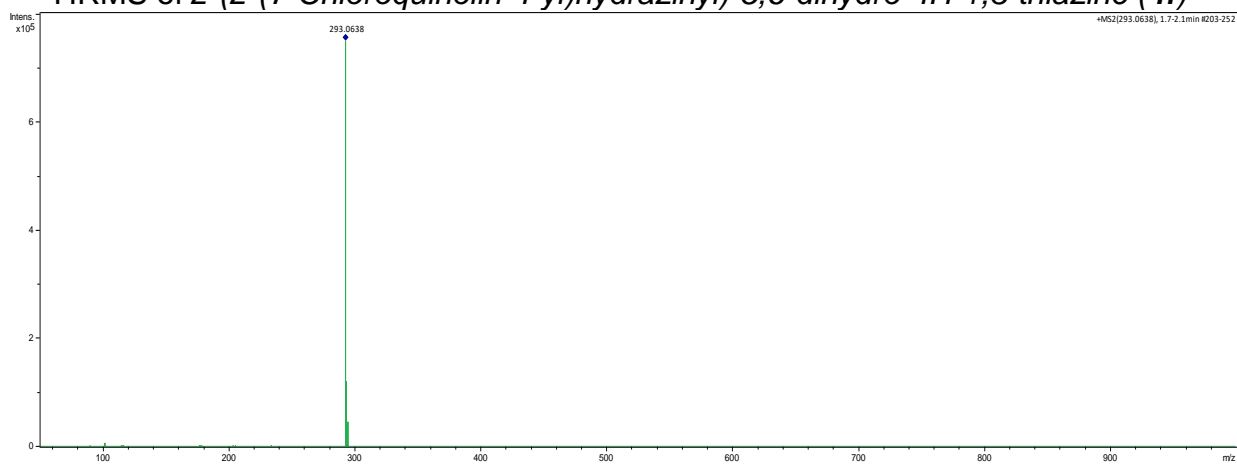

HPLC of *(E)*-2-(2-((1*H*-indol-3-yl)methylene)hydrazinyl)thiazol-4(5*H*)-one (**5a**)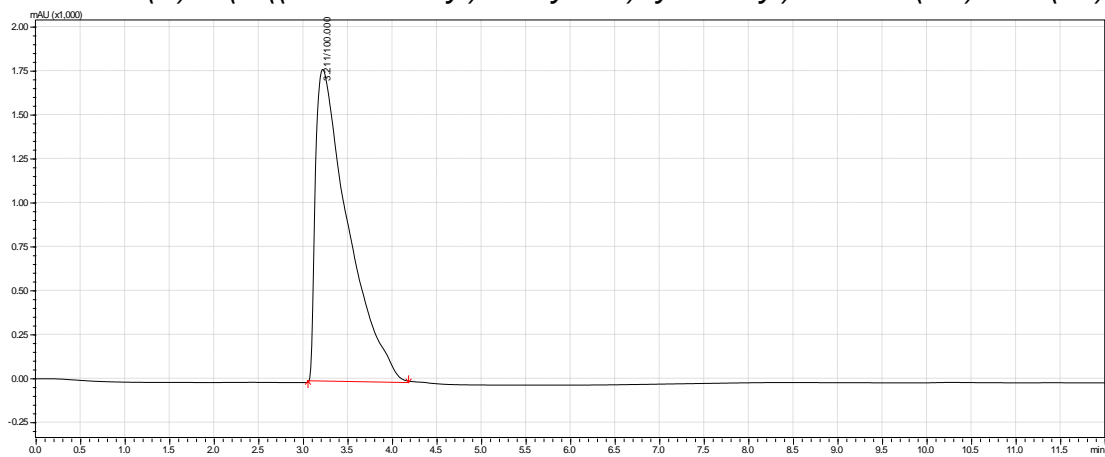HRMS of *(E)*-2-(2-((1*H*-indol-3-yl)methylene)hydrazinyl)thiazol-4(5*H*)-one (**5a**)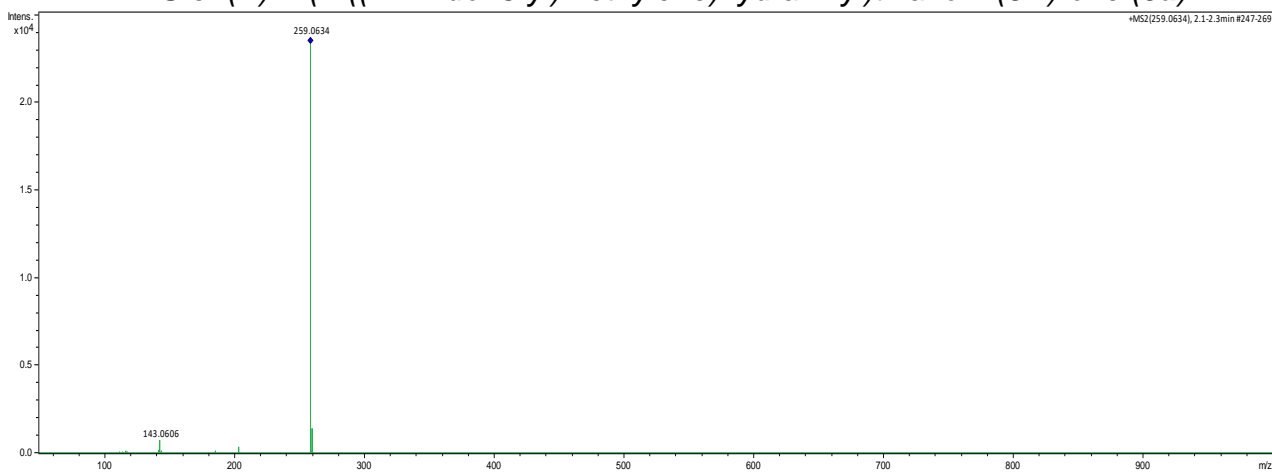



$^1\text{H}$  NMR of (*E*)-2-(2-(2-((1*H*-indol-3-yl)methylene)hydrazinyl)-4-oxo-4,5-dihydrothiazol-5-yl)acetic acid (**5b**)

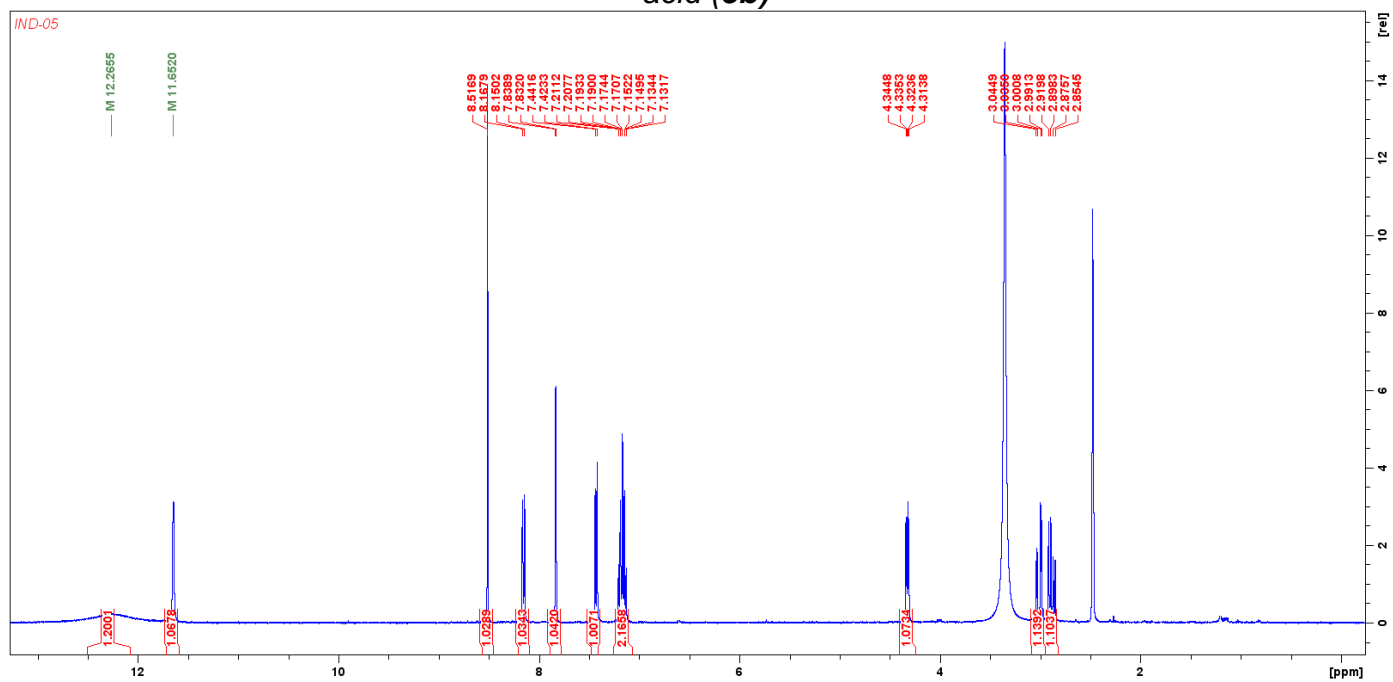

$^{13}\text{C}$  NMR of (*E*)-2-(2-(2-((1*H*-indol-3-yl)methylene)hydrazinyl)-4-oxo-4,5-dihydrothiazol-5-yl)acetic acid (**5b**)

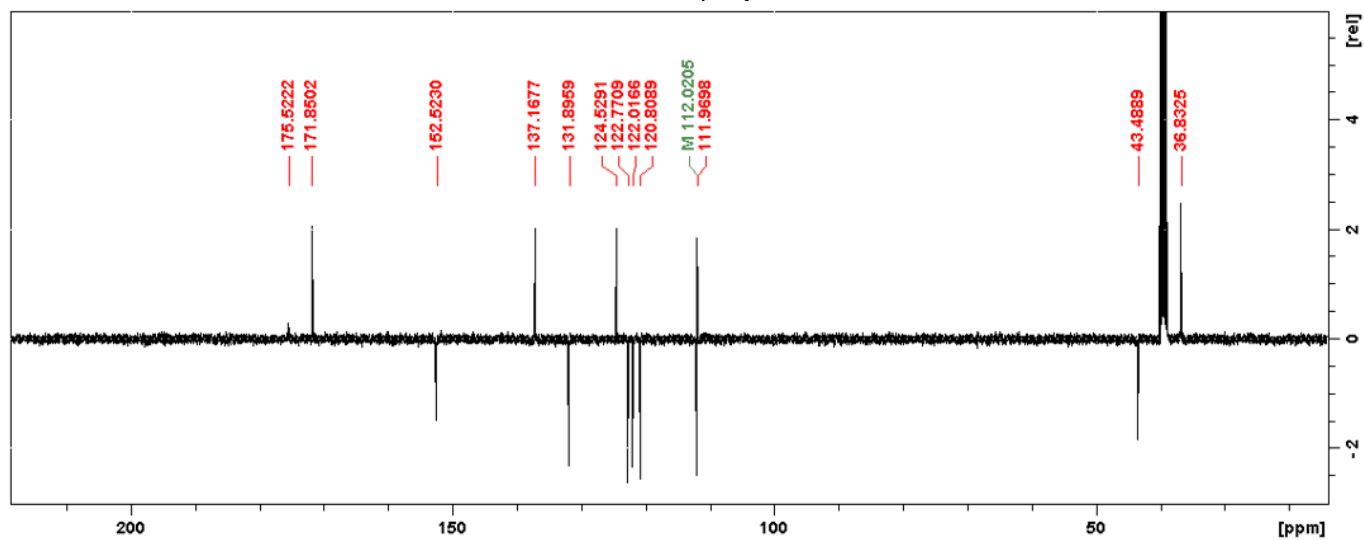

HPLC of *(E)*-2-(2-(2-((1*H*-indol-3-yl)methylene)hydrazinyl)-4-oxo-4,5-dihydrothiazol-5-yl)acetic acid (**5b**)

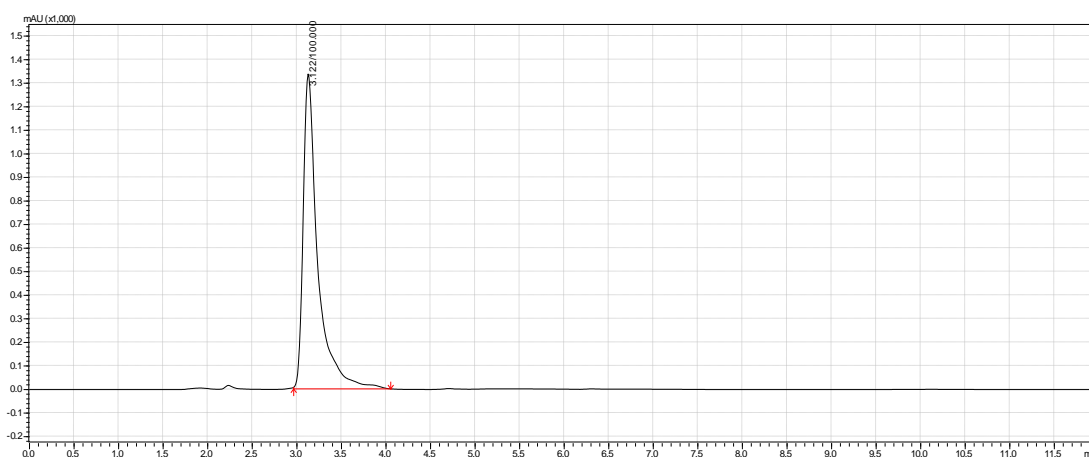

HRMS of *(E)*-2-(2-(2-((1*H*-indol-3-yl)methylene)hydrazinyl)-4-oxo-4,5-dihydrothiazol-5-yl)acetic acid (**5b**)

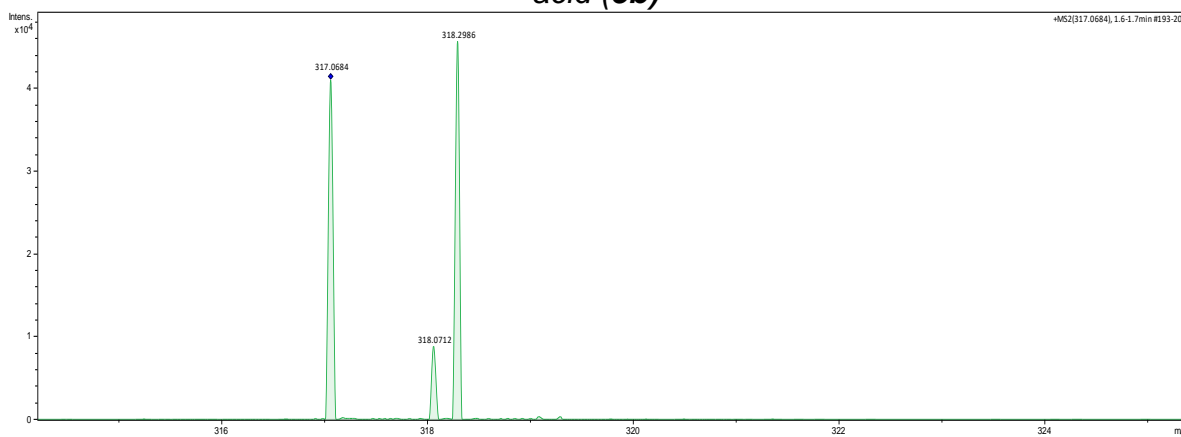

HPLC of (*E*)-ethyl 2-(2-((1*H*-indol-3-yl)methylene)hydrazinyl)-4-methylthiazole-5-carboxylate (**5c**)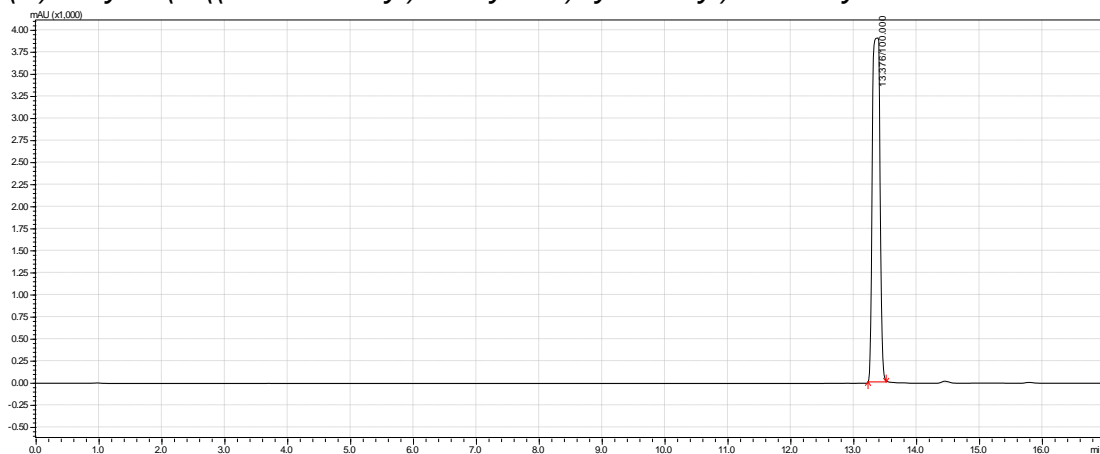HRMS of (*E*)-ethyl 2-(2-((1*H*-indol-3-yl)methylene)hydrazinyl)-4-methylthiazole-5-carboxylate (**5c**)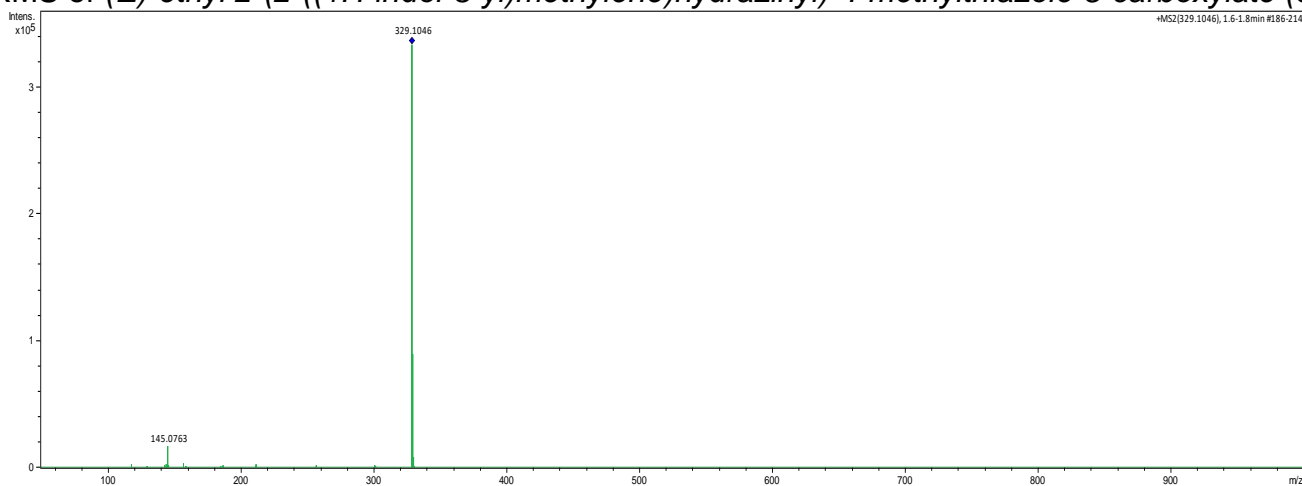

HPLC of *(E)*-2-(2-((1*H*-indol-3-yl)methylene)hydrazinyl)-4-phenylthiazole (**5d**)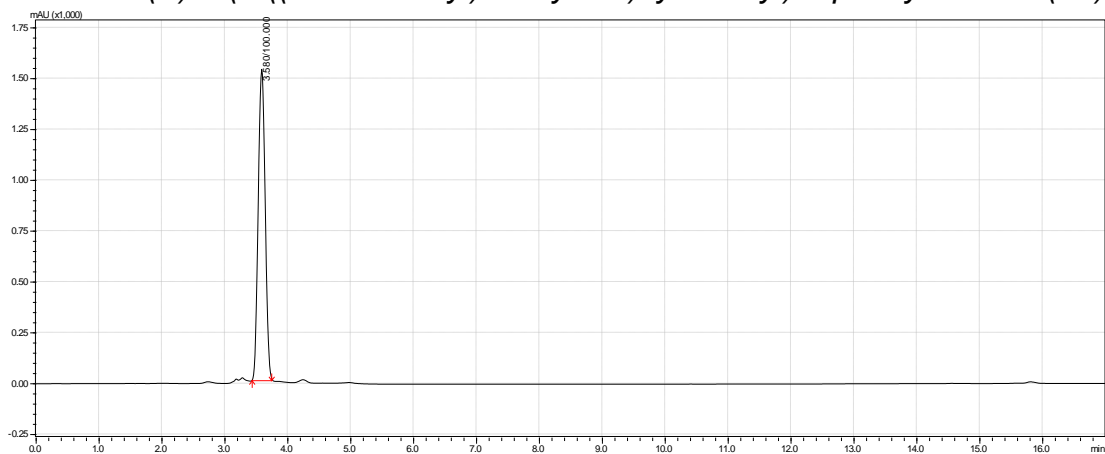HRMS of *(E)*-2-(2-((1*H*-indol-3-yl)methylene)hydrazinyl)-4-phenylthiazole (**5d**)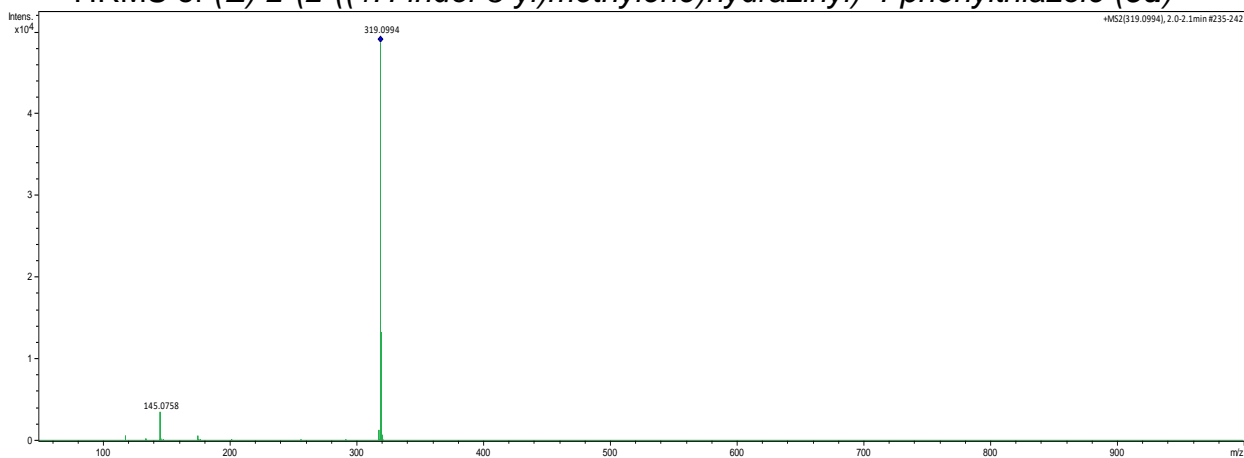

$^1\text{H}$  NMR of (*E*)-2-(2-((1*H*-indol-3-yl)methylene)hydrazinyl)-4,5-dihydrothiazole (**5e**)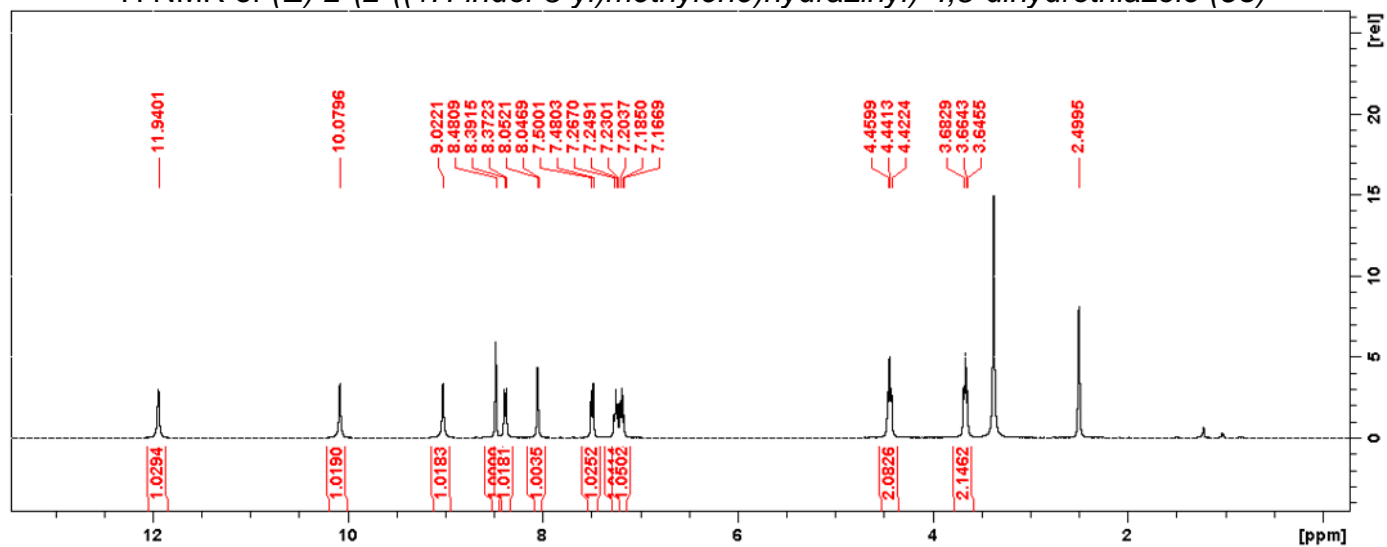 $^{13}\text{C}$  NMR of (*E*)-2-(2-((1*H*-indol-3-yl)methylene)hydrazinyl)-4,5-dihydrothiazole (**5e**)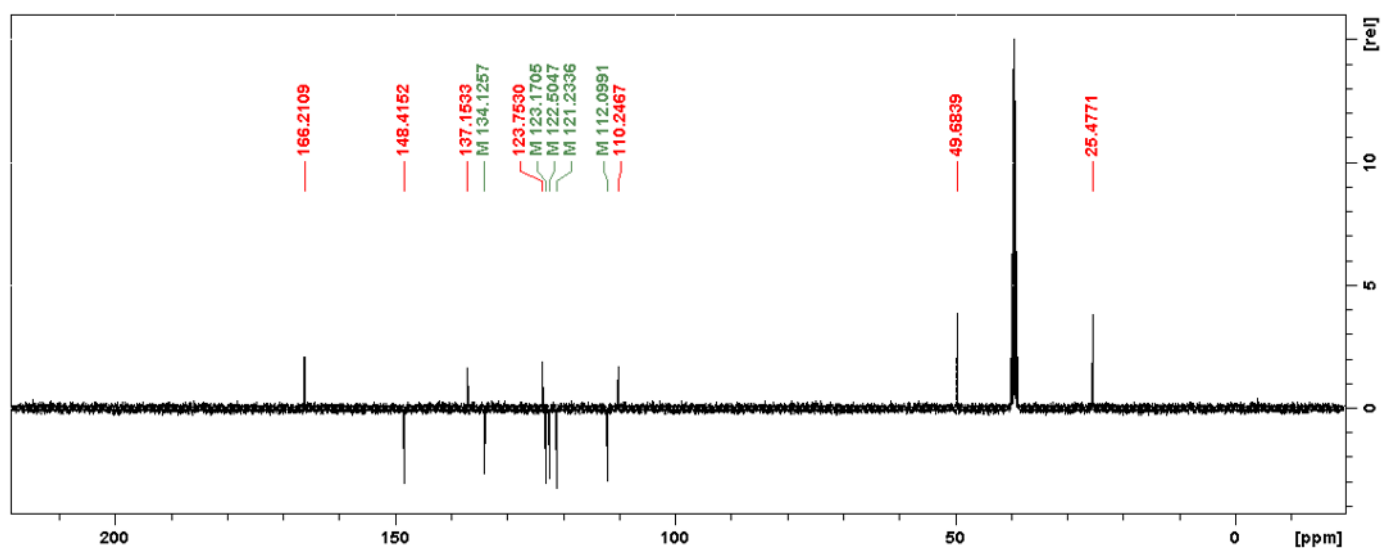

HPLC of *(E)*-2-(2-((1*H*-indol-3-yl)methylene)hydrazinyl)-4,5-dihydrothiazole (**5e**)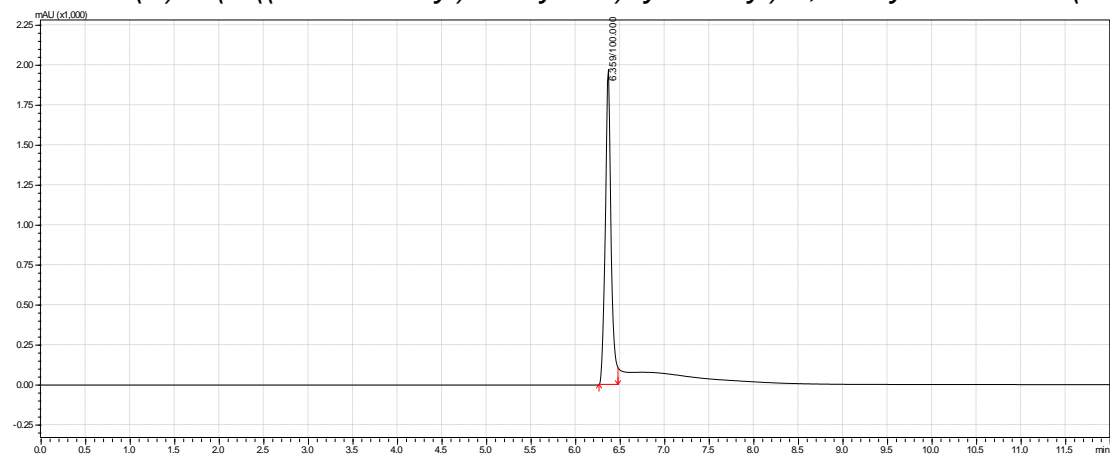HRMS of *(E)*-2-(2-((1*H*-indol-3-yl)methylene)hydrazinyl)-4,5-dihydrothiazole (**5e**)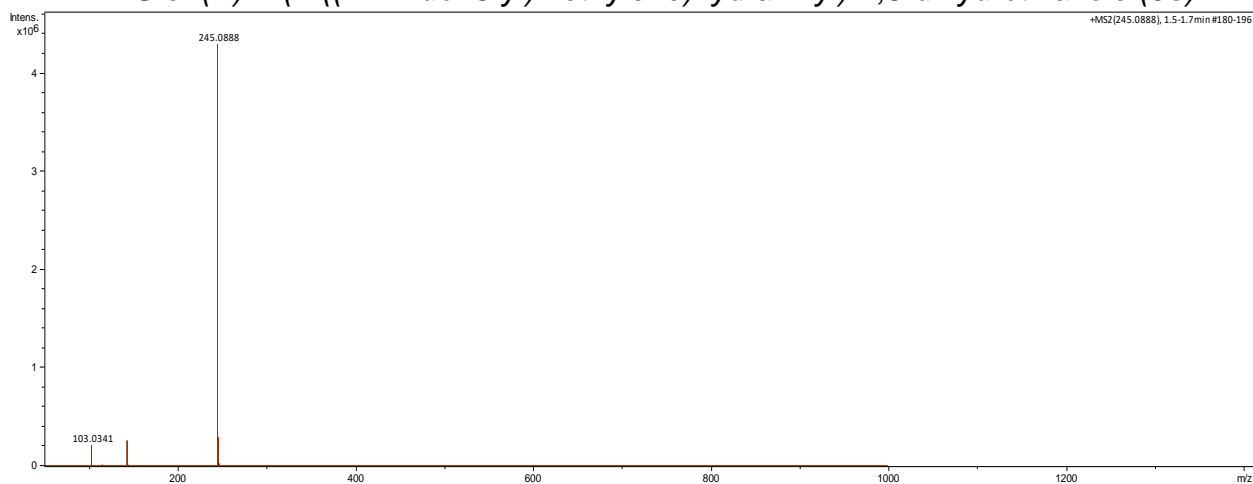

$^1\text{H}$  NMR of (*E*)-2-(2-((1*H*-indol-3-yl)methylene)hydrazinyl)-5,6-dihydro-4*H*-1,3-thiazine (**5f**)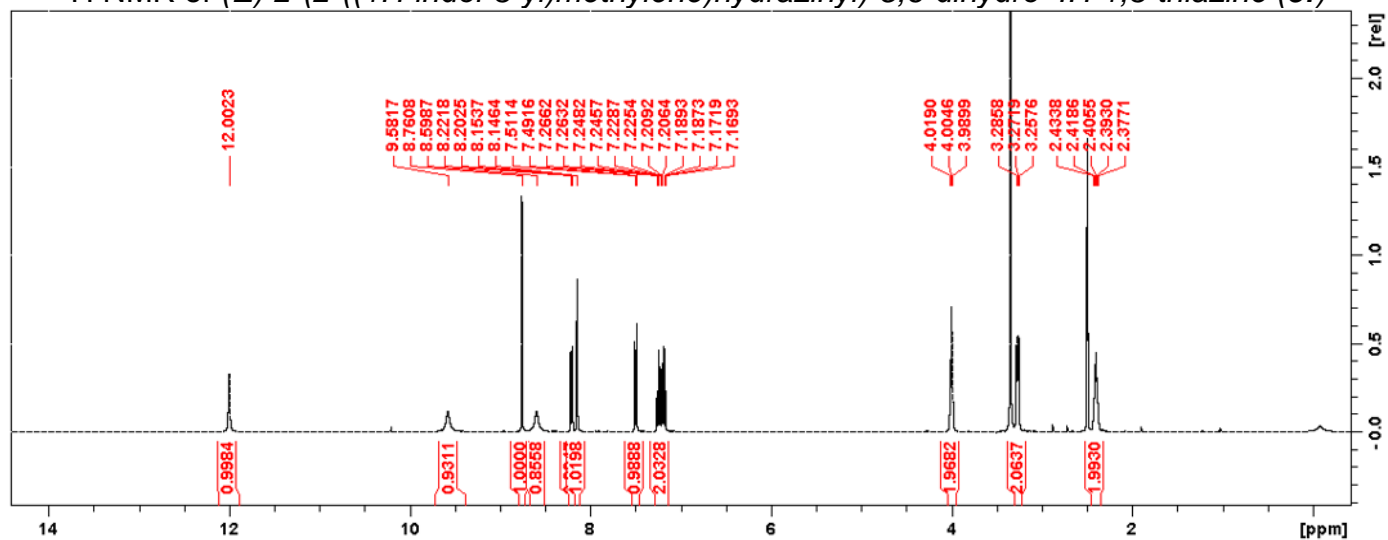 $^{13}\text{C}$  NMR of (*E*)-2-(2-((1*H*-indol-3-yl)methylene)hydrazinyl)-5,6-dihydro-4*H*-1,3-thiazine (**5f**)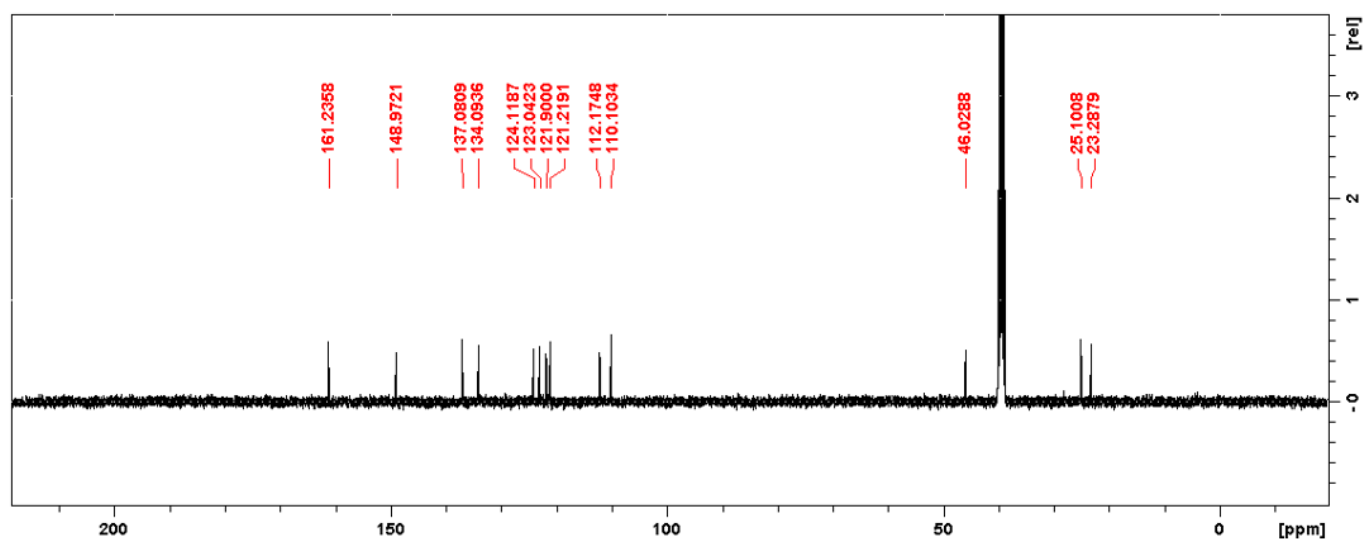

HPLC of *(E)*-2-(2-((1*H*-indol-3-yl)methylene)hydrazinyl)-5,6-dihydro-4*H*-1,3-thiazine (**5f**)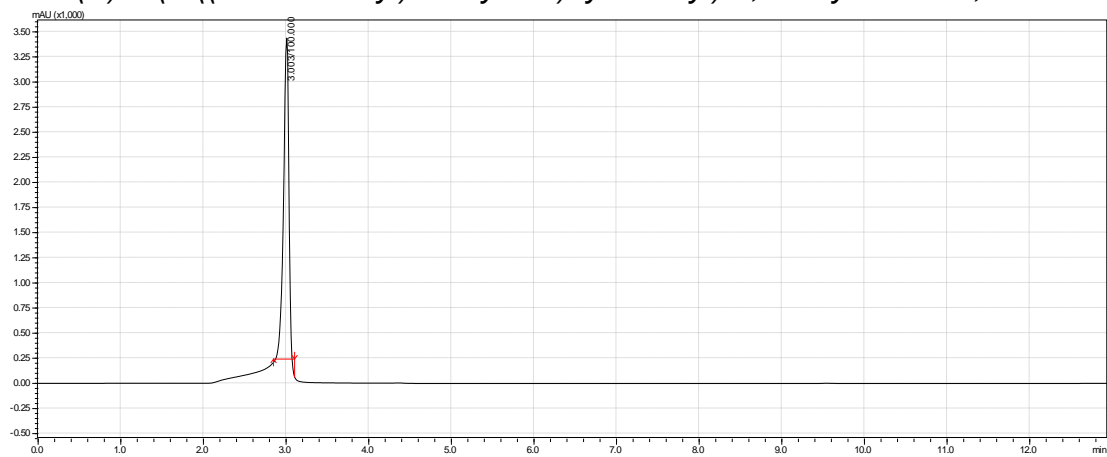HRMS of *(E)*-2-(2-((1*H*-indol-3-yl)methylene)hydrazinyl)-5,6-dihydro-4*H*-1,3-thiazine (**5f**)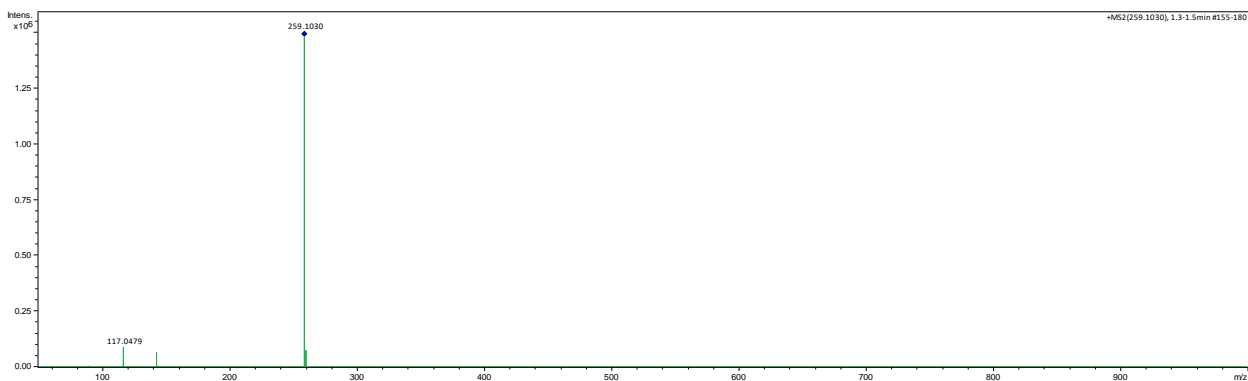

Supplement: d1nj02105b1.pdf [file d1nj02105b1.pdf]
